# Supplementary material for: Use of antimicrobial resistance information and prescribing guidance for management of urinary tract infections: survey of general practitioners in the West Midlands
Source: PubMed Central journal article supplement (PMC4877747; doi:10.1186/s12879-016-1559-2), 2016-05-24
Supplement: 12879_2016_1559_MOESM1_ESM.pdf [file 12879_2016_1559_MOESM1_ESM.pdf]

## Management of community UTI

 Survey logo

### Welcome to this HPA Survey

The HPA Regional Epidemiology Unit is developing an Antimicrobial Resistance (AMR) surveillance bulletin for GP's in the West Midlands. To help understand potential variation in collection of samples for microbiological investigation and antimicrobial prescribing habits we would be very grateful if you could complete this short survey on the management of UTI.

1. Please provide the name of your practice (primary if you have more than one)\*

2. Please enter your national Practice Code or if not known the Practice Postcode

|   | National Practice Code (e.g. M123456) | OR Practice Post Code |
|---|---------------------------------------|-----------------------|
| * | <input type="text"/>                  | <input type="text"/>  |

3. Your age?\*

<35 years       35-45 years       46-55 years       >55 years

4. Please can you enter the number of years since qualified.

5. Your gender?\*

Male       Female

## Management of community UTI

 Survey logo

6. Is there a practice policy or protocol for sending urine specimens for microbiological examination?\*

Yes  No

7. Does your practice use specific prescribing formularies ?\*

If YES then please state the source of this guidance (e.g. HPA, PCT, BNF etc)

Yes  No

8. If the answer to question 7 is YES then please state the source of the prescribing formuarie used in your practice (e.g. PCT, HPA, BNF)

9. Do laboratory antimicrobial susceptibility results for urinary isolates influence your antibiotic prescribing for:

|                                                          | Always                | Frequently            | Infrequently          | Never                 |
|----------------------------------------------------------|-----------------------|-----------------------|-----------------------|-----------------------|
| General empirical prescribing:                           | <input type="radio"/> | <input type="radio"/> | <input type="radio"/> | <input type="radio"/> |
| In the case of a treatment failure:                      | <input type="radio"/> | <input type="radio"/> | <input type="radio"/> | <input type="radio"/> |
| When resistance is reported to initial prescribed agent: | <input type="radio"/> | <input type="radio"/> | <input type="radio"/> | <input type="radio"/> |

10. Based on your experience of treating patients presenting with clinically suspected UTI what approximate proportion would you request a urine sample for microbiological examination [%]?\* The value must be between 0 and 100, inclusive.

%

11. Has your practice reviewed the management of urinary tract infections within the last 12 months?\*
- Yes  No

## Management of community UTI

 Survey logo

For each of the scenario's below please state whether (a) a urine sample would be taken for microbiological examination and (b) an antibiotic agent prescribed (if prescribed empirically)

12. Case 1. A 20 year old lady re-attends surgery and complains that the loin pain and frequent urination symptoms reported to you the previous week had worsened despite finishing a complete course of trimethoprim (no sample was taken previously).

|                                                                   | Yes                      | No                       |
|-------------------------------------------------------------------|--------------------------|--------------------------|
| Would you collect a urine sample for microbiological examination? | <input type="checkbox"/> | <input type="checkbox"/> |
| Would you prescribe an antibiotic?                                | <input type="checkbox"/> | <input type="checkbox"/> |

13. Case 3. A 43 year old woman complains of pain passing urine and frequency. She feels well otherwise and has not previously been treated for a UTI.

|                                                                   | Yes                      | No                       |
|-------------------------------------------------------------------|--------------------------|--------------------------|
| Would you collect a urine sample for microbiological examination? | <input type="checkbox"/> | <input type="checkbox"/> |
| Would you prescribe an antibiotic?                                | <input type="checkbox"/> | <input type="checkbox"/> |

14. Case 4. A 51 year-old man attends your surgery complaining of pain passing urine and perineal tenderness. On examination you find suprapubic tenderness and a temperature of 38.5 C is measured.

|                                                                   | Yes                      | No                       |
|-------------------------------------------------------------------|--------------------------|--------------------------|
| Would you collect a urine sample for microbiological examination? | <input type="checkbox"/> | <input type="checkbox"/> |
| Would you prescribe an antibiotic?                                | <input type="checkbox"/> | <input type="checkbox"/> |

15. Case 5. During a routine antenatal clinic an 18 year old girl who is 20 weeks pregnant produces a cloudy urine sample. She reports no symptoms or discomfort. The urine dipstick tests positive for nitrite but negative for leukocytes and protein.

|                                                                   | Yes                      | No                       |
|-------------------------------------------------------------------|--------------------------|--------------------------|
| Would you collect a urine sample for microbiological examination? | <input type="checkbox"/> | <input type="checkbox"/> |
| Would you prescribe an antibiotic?                                | <input type="checkbox"/> | <input type="checkbox"/> |

16. Case 6. You visit an 82 year old female in a nursing home. She is catheterised, afebrile and has no symptoms but the staff inform you that the urine is cloudy.

|                                                                   | Yes                      | No                       |
|-------------------------------------------------------------------|--------------------------|--------------------------|
| Would you collect a urine sample for microbiological examination? | <input type="checkbox"/> | <input type="checkbox"/> |
| Would you prescribe an antibiotic?                                | <input type="checkbox"/> | <input type="checkbox"/> |

17. Please let us know if you have any additional comments regarding this survey.  
Please enter any comments in the box below.
